# Supplementary material
Source: MDPI journal article supplement (https://www.mdpi.com/2079-9268/2/2/168)
Supplement: s1 [file s1]

*Correction*

## **Heavy Ion Characterization of a Radiation Hardened Flip-Flop Optimized for Subthreshold Operation. *J. Low Power Electron. Appl.* **2012**, *2*, 168-179**

**Ameet Chavan<sup>1</sup>, Praveen Palakurthi<sup>1</sup>, Eric MacDonald<sup>1,\*</sup>, Joseph Neff<sup>2</sup> and Eric Bozeman<sup>2</sup>**

<sup>1</sup> University of Texas at El Paso, Electrical and Computer Engineering, El Paso, TX 79968, USA;  
E-Mails: aochavan@utep.edu (A.C); pkpalakurthi@miners.utep.edu (P.P.)

<sup>2</sup> SPAWAR System Center, Navy, San Diego, CA 92152, USA;  
E-Mails: jdneff@spawar.navy.mil (J.N.); eric.bozeman@navy.mil (E.B.)

\* Author to whom correspondence should be addressed; E-Mail: emac@utep.edu;  
Tel.: +915-747-6959; Fax: +915-747-7871.

*Received: 25 September 2012 / Published: 26 September 2012*

---

We have found the following error in the title of this article which was recently published in *J. Low Power Electron. Appl.* [1]:

The correct title should be: **Heavy Ion Characterization of a Radiation Hardened Flip-Flop Optimized for Subthreshold Operation.**

We apologize for any inconvenience caused to the readers.

### **References**

1. Chavan, A.; Palakurthi, P.; MacDonald, E.; Neff, J.; Bozeman, E. Hardened Flip-Flop Optimized for Subthreshold Operation Heavy Ion Characterization of a Radiation. *J. Low Power Electron. Appl.* **2012**, *2*, 168–179.

© 2012 by the authors; licensee MDPI, Basel, Switzerland. This article is an open access article distributed under the terms and conditions of the Creative Commons Attribution license (<http://creativecommons.org/licenses/by/3.0/>).
